# Supplementary material for: A 3D-printed Al metal–organic framework/S cathode with efficient adsorption and redox conversion of polysulfides in lithium–sulfur batteries
Source: Royal Society of Chemistry journal article supplement (doi:10.1039/d2ta09766d), 2023-01-01
Supplement: d2ta09766d2.pdf [file d2ta09766d2.pdf]

## Supporting information

### **3D-printed Al metal-organic framework/S cathode with efficient adsorption and redox conversion of polysulfides in lithium-sulfur batteries**

Wen Xi,<sup>1</sup> Junpu Zhang,<sup>1</sup> Youfang Zhang,<sup>2</sup> Rui Wang,<sup>1</sup> Yansheng Gong,<sup>1</sup> Beibei He,<sup>1</sup>  
Huanwen Wang,<sup>1</sup> Jun Jin<sup>1,3\*</sup>

<sup>1</sup>*Faculty of Materials Science and Chemistry, China University of Geosciences, Wuhan 430074, China;*

<sup>2</sup>*Hubei Key Laboratory of Polymer Materials, Ministry of Education Key Laboratory for Green Preparation and Application of Functional Materials, School of Materials Science and Engineering, Hubei University, Wuhan 430062, China;*

<sup>3</sup>*Shenzhen Research Institute, China University of Geosciences, Shenzhen 518000, China.*

*\*Corresponding author. E-mail address: jinjun@cug.edu.cn*

## **Characterizations and electrochemical measurements**

### **1. Characterizations**

The morphologies and structures of samples are tested by scanning electron microscope (SEM, Hitachi SU-3500) and transmission electron microscope (TEM, FEI Talos F200S). To take optical and SEM images of the 3DP Al-MOF/S cathode, the 3D grid cathode printed on the battery shell is put into water, and the free-standing 3DP Al-MOF/S cathode is detached from the battery shell after 1 min. The X-ray diffraction (XRD) patterns of the samples are characterized on a D8-FOCUS (Bruker AXS, Panalytical) instrument with Cu K $\alpha$  radiation (1.5418 Å) at 40 kV and 40 mA. The nitrogen adsorption-desorption isotherms and specific surface areas are tested on Micrometrics equipment (ASAP-2460). The X-ray photoelectron spectroscopy (XPS) spectra are collected using a Theta Probe electron spectrometer (Thermo Scientific K-Alpha).

### **2. Electrochemical measurements**

The Li-S batteries (CR 2032-type coin cells) are assembled in an Ar-filled glove box using 3DP Al-MOF/S cathode, Celgard 2400 separator, and Li anode. 20  $\mu$ L of 1.0 M LiTFSI in DOL/DME (1:1 by volume) electrolyte with 1.0% LiNO<sub>3</sub> is used in the cells. The printed grid electrode area of the 3DP cathode is 0.36 cm<sup>2</sup>, and the actual area of the 3DP cathode is 0.182 cm<sup>2</sup>. Galvanostatic charge-discharge measurements are performed on a Land CT3001A battery tester with a voltage range from 1.7 to 2.7 V. Cyclic voltammetry (CV) curves are tested on an electrochemical workstation (CHI660E) at different scan rates in a voltage range of 1.7 - 2.8 V. Electrochemical impedance spectra (EIS) are collected on a Gamry workstation in a frequency ranging from 10<sup>5</sup> to 10<sup>-2</sup> Hz.

**Table S1.** The mass loading parameters of the 3DP Al-MOF-160/S electrode.

| <b>Electrode</b> | <b>Total mass (mg)</b> | <b>Mass of Al-MOF-160/S (mg)</b> | <b>Mass of sulfur (mg)</b> | <b>Sulfur loading (mg cm<sup>-2</sup>)</b> | <b>actual area (cm<sup>2</sup>)</b> |
|------------------|------------------------|----------------------------------|----------------------------|--------------------------------------------|-------------------------------------|
|                  | 1.181                  | 0.827                            | 0.496                      | 2.730                                      |                                     |
| 3DP Al-MOF-      | 1.931                  | 1.352                            | 0.811                      | 4.270                                      | 0.182                               |
| 160/S            | 2.214                  | 1.550                            | 0.930                      | 5.120                                      |                                     |
|                  | 6.896                  | 4.808                            | 2.885                      | 15.85                                      |                                     |

**Table S2.** The sizes of macropores and porosity in the 3DP electrode.

| Material         | 3DP printing electrode |            |             | Number | Macropores  |            |             | Total volume (mm <sup>3</sup> ) | Macropore Volume (mm <sup>3</sup> ) | Porosity (%) |
|------------------|------------------------|------------|-------------|--------|-------------|------------|-------------|---------------------------------|-------------------------------------|--------------|
|                  | Length (mm)            | Width (mm) | Height (mm) |        | Length (mm) | Width (mm) | Height (mm) |                                 |                                     |              |
| 3DP Al-MOF-160/S | 6                      | 6          | 0.213       | 36     | 0.703       | 0.703      | 0.213       | 7.668                           | 3.790                               | 49.4         |

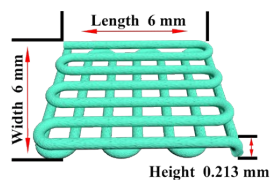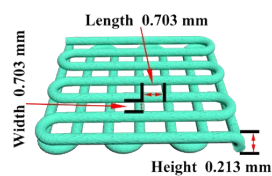

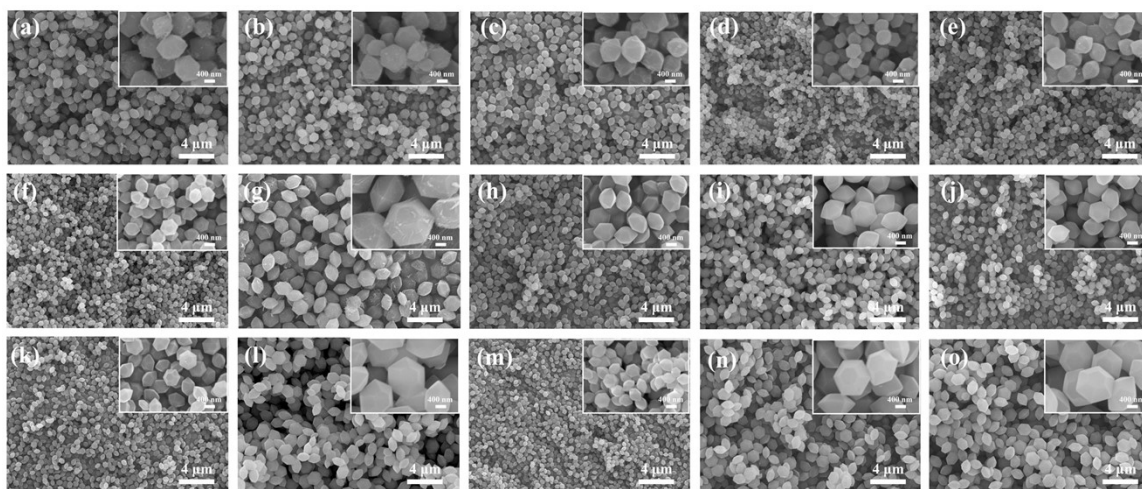

**Figure S1.** SEM images of the Al-MOF samples fabricated at (a)-(e) 120 °C, (f)-(j) 140 °C, and (k)-(o) 160 °C for 8, 10, 12, 14, and 16 h.

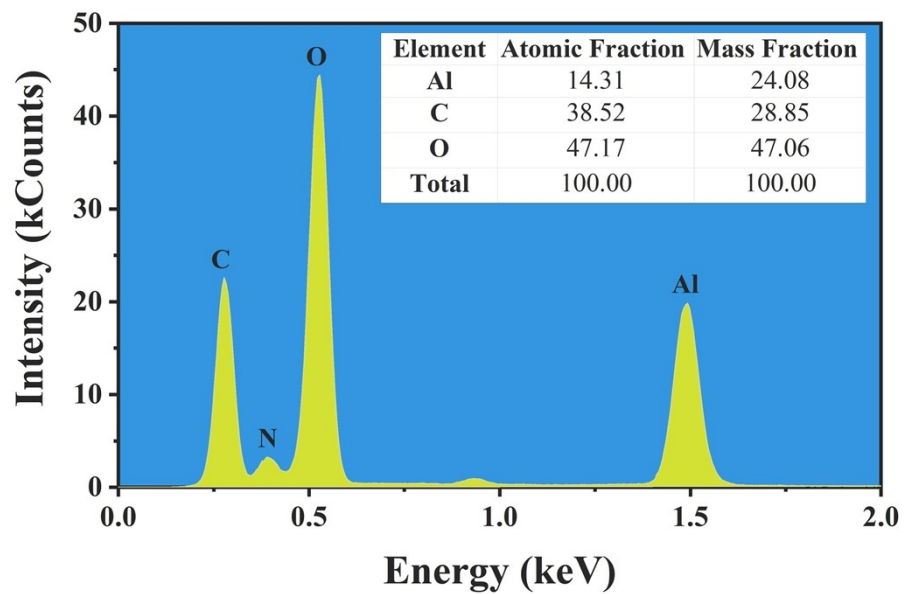

**Figure S2.** The TEM-EDS spectrum of Al-MOF-160.

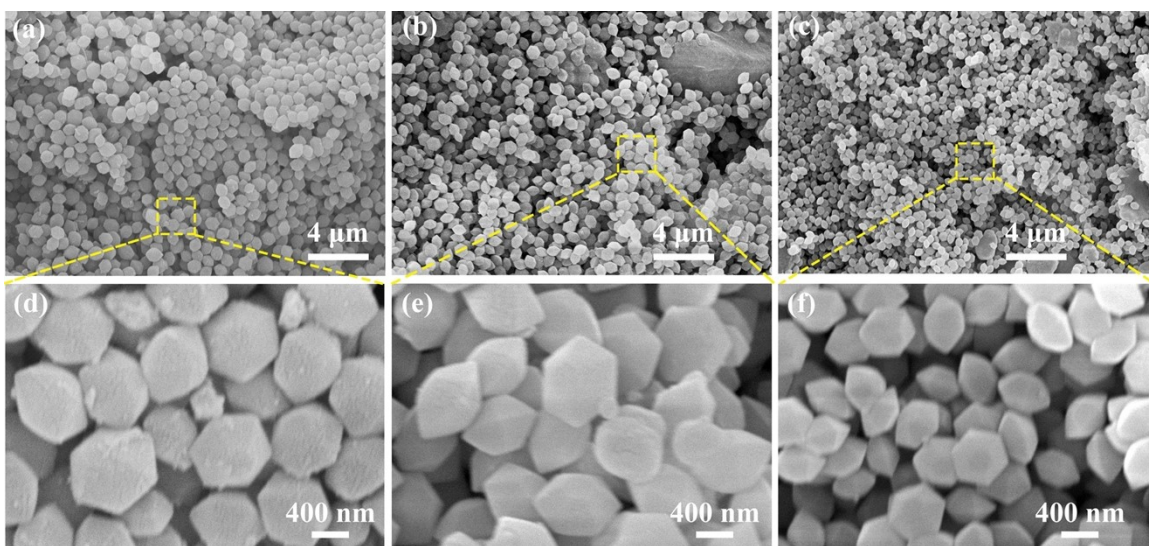

**Figure S3.** SEM images of (a), (d) Al-MOF-120/S, (b), (e) Al-MOF-140/S, and (c), (f) Al-MOF-160/S.

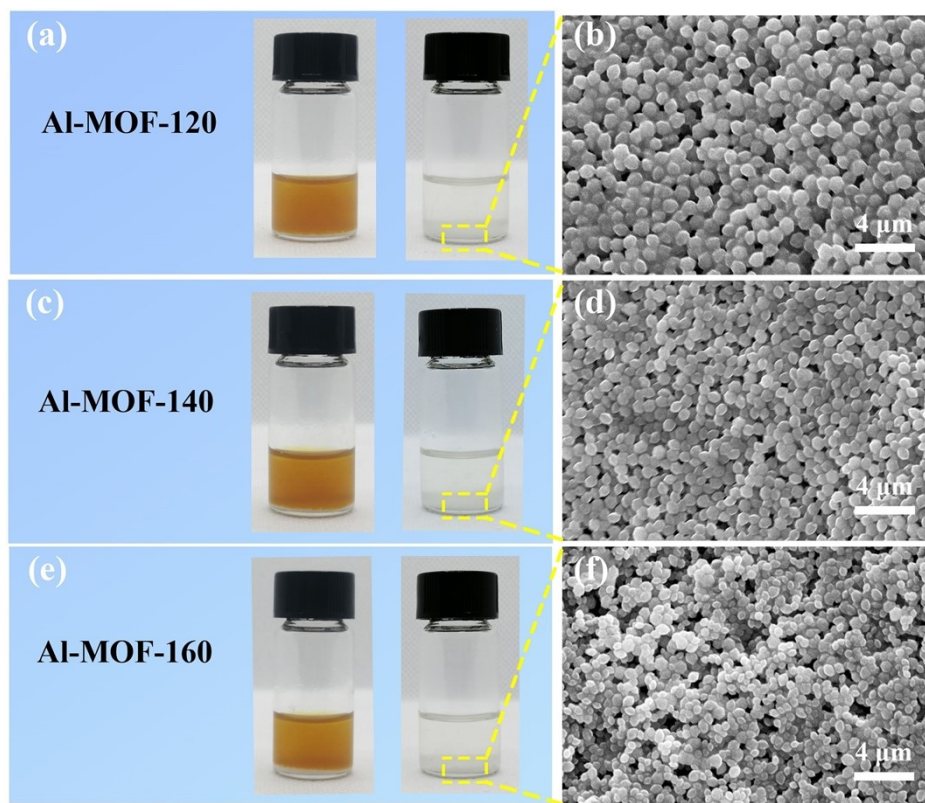

**Figure S4.** Visual demonstration of static  $\text{Li}_2\text{S}_4$  adsorption properties of (a) Al-MOF-120, (c) Al-MOF-140, and (e) Al-MOF-160. The SEM images of (b) Al-MOF-120, (d) Al-MOF-140, and (f) Al-MOF-160 after  $\text{Li}_2\text{S}_4$  adsorption.



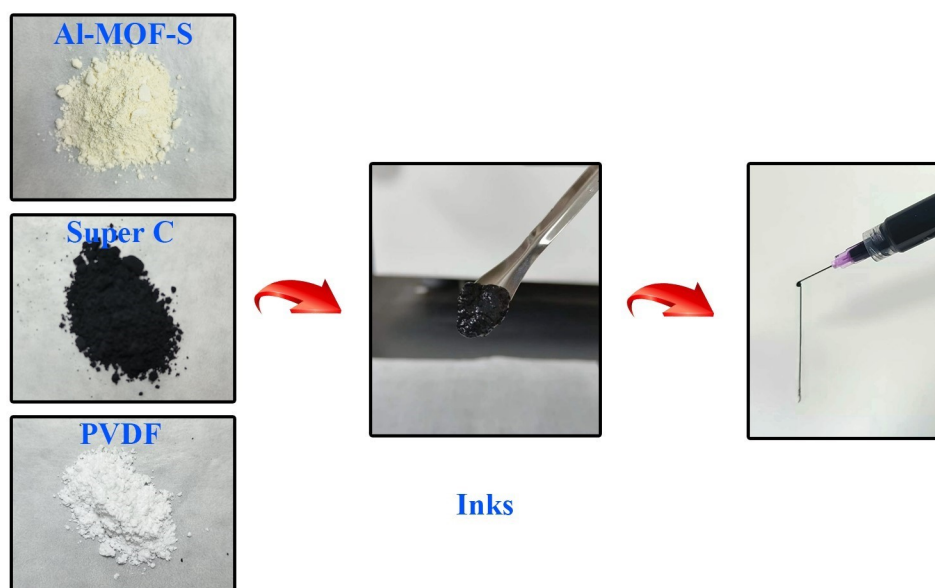

**Figure S5.** Schematic illustration of the 3DP ink preparation.

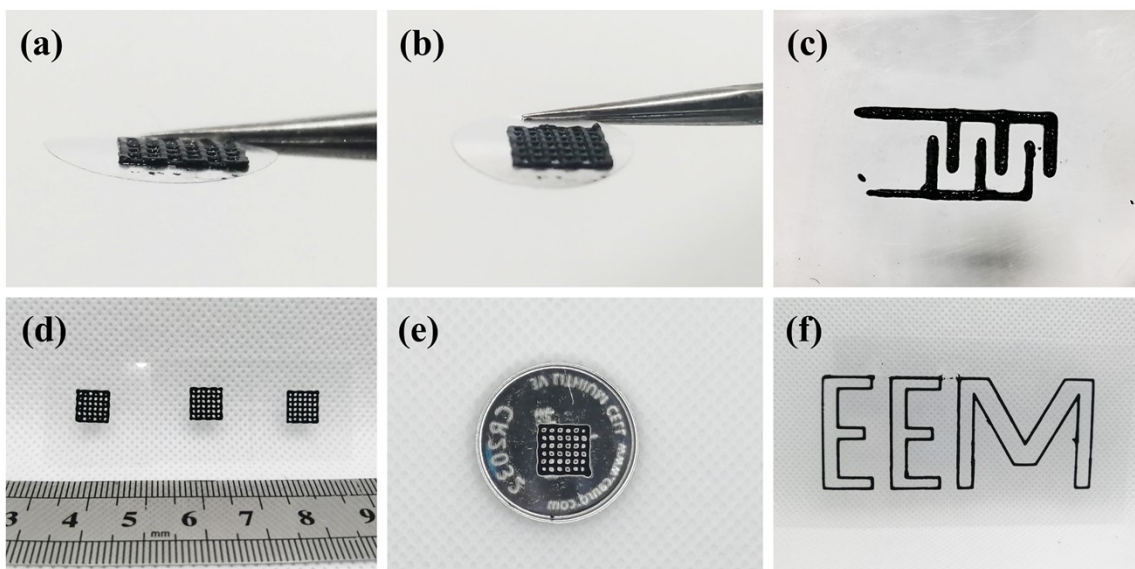

**Figure S6.** Various 3DP patterns printed from as-prepared Al MOF/S inks.

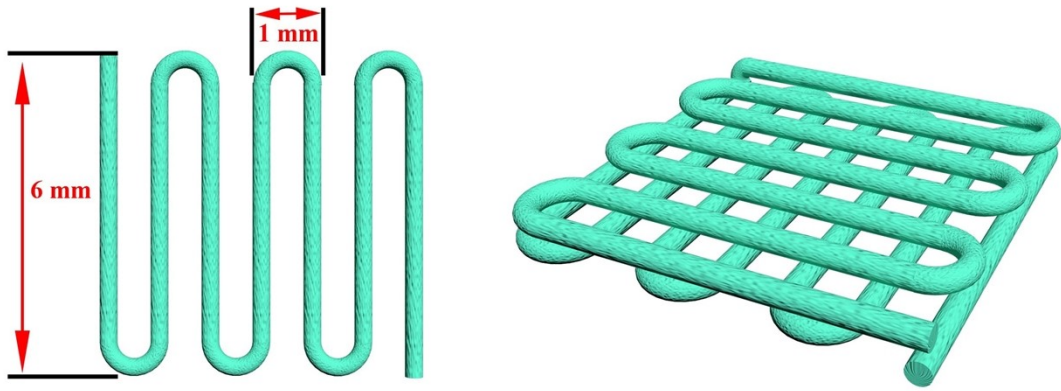

**Figure S7.** The printing size of the 3D-printed electrode.

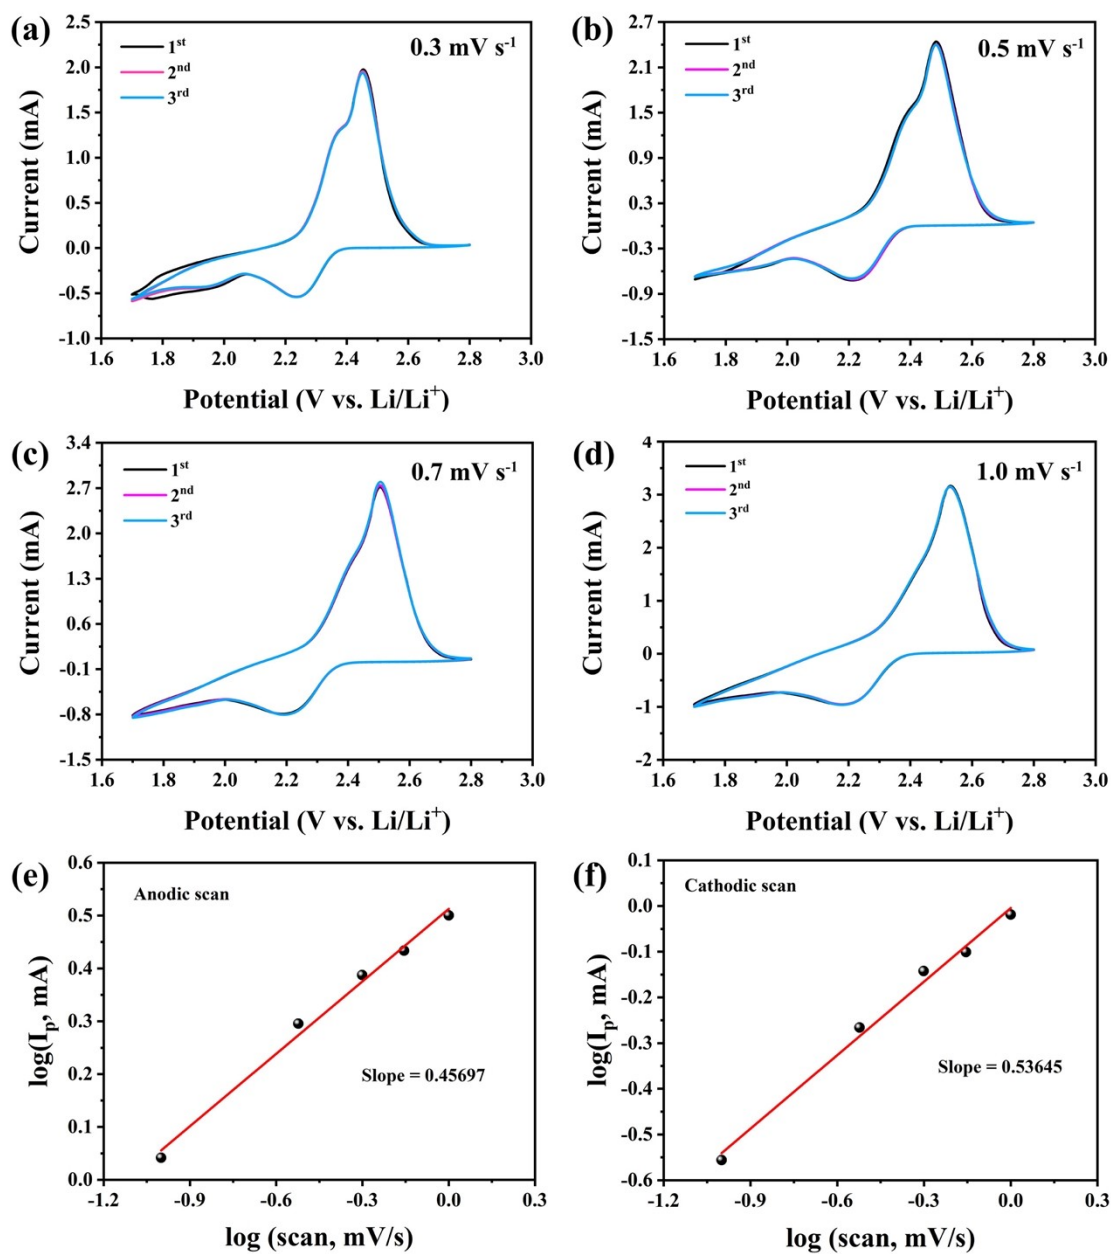

**Figure S8.** (a)-(d) CV curves of 3DP Al-MOF-160/S at different scan rates (0.3, 0.5, 0.7, and  $1.0 \text{ mV s}^{-1}$ ). (e)-(f) The determination of the  $b$ -value using the relationship between current intensity and scan rate.

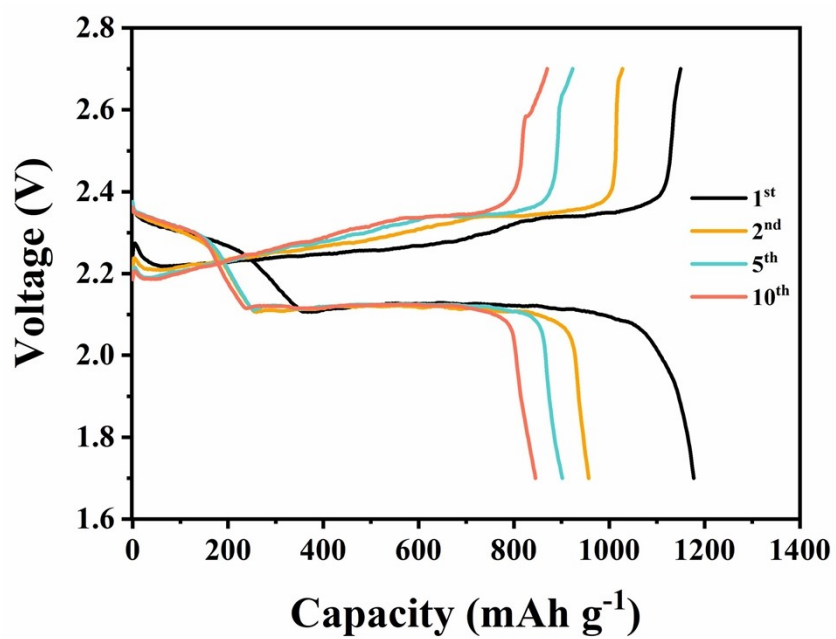

**Figure S9.** The charging-discharging profiles of the 3DP Al-MOF-160/S cathode at 0.1 C.

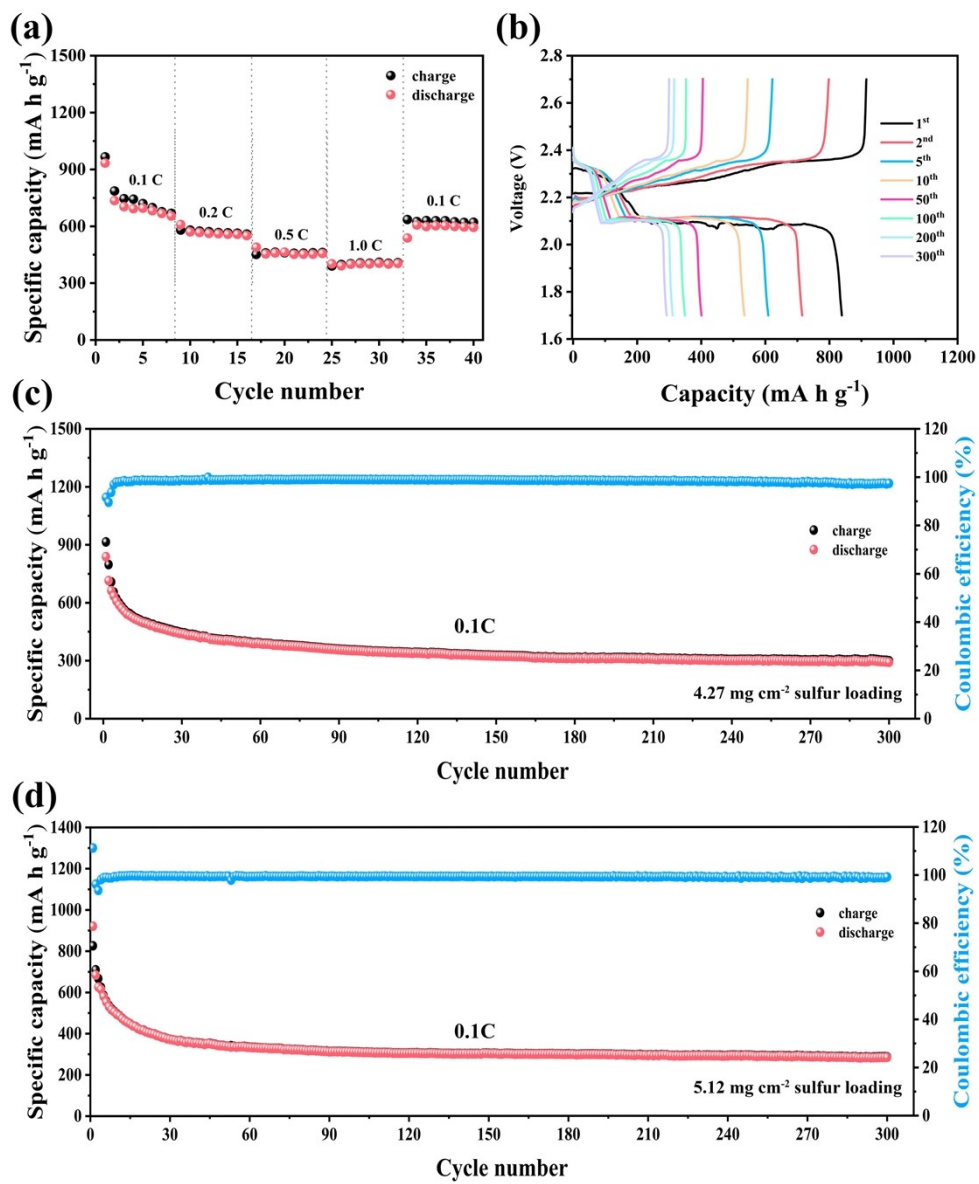

**Figure S10.** (a) Rate capabilities at various rates (0.1, 0.2, 0.5, 1.0, and 0.1 C), (b) charging/discharging profiles at select cycles, (c) cycling performance of 3DP Al-MOF-160/S at 0.1 C with sulfur loading of 4.27 mg cm<sup>-2</sup>, and (d) cycling performance of 3DP Al-MOF-160/S at 0.1 C with sulfur loading of 5.12 mg cm<sup>-2</sup>.

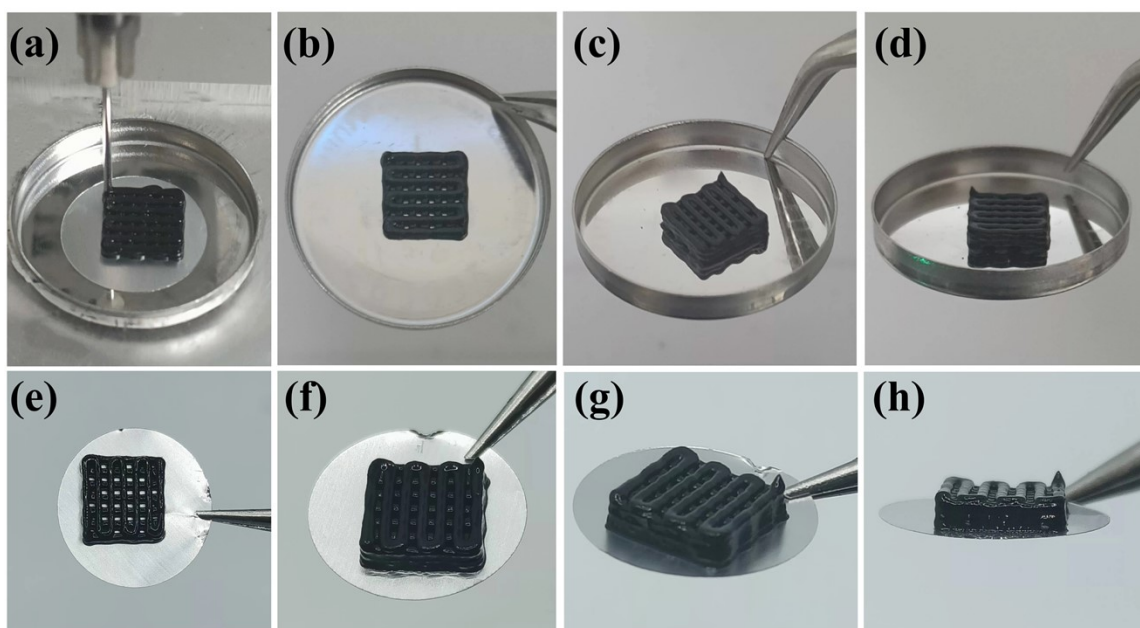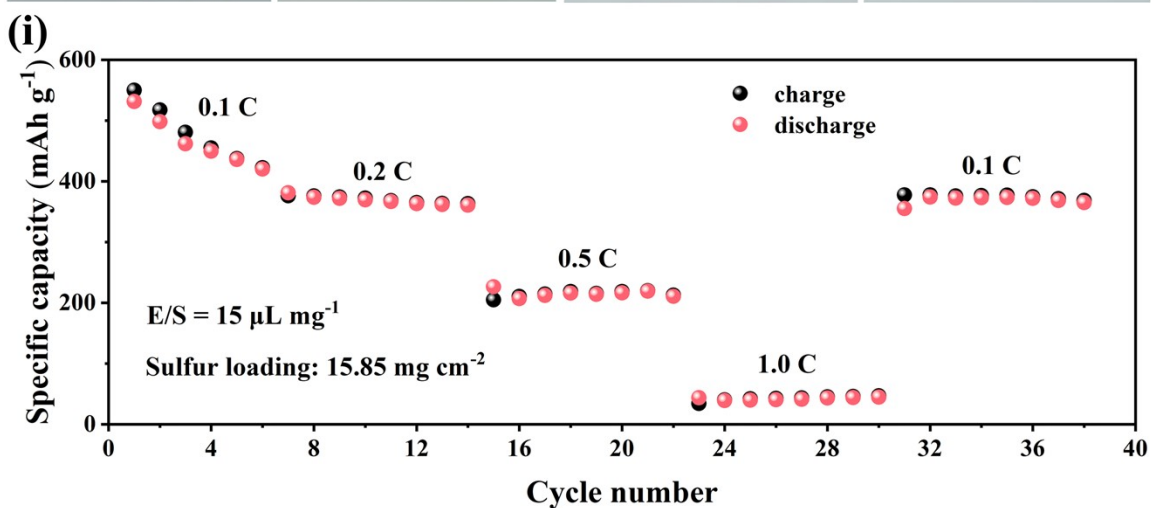

**Figure S11.** (a)-(h) Optical images of the 3DP Al-MOF-160/S cathode with high sulfur loading of 15.85 mg cm<sup>-2</sup>. (i) Rate performance of the 3DP Al-MOF-160/S cathode with sulfur loading of 15.85 mg cm<sup>-2</sup> at 0.1, 0.2, 0.5, 1.0, and 0.1 C.

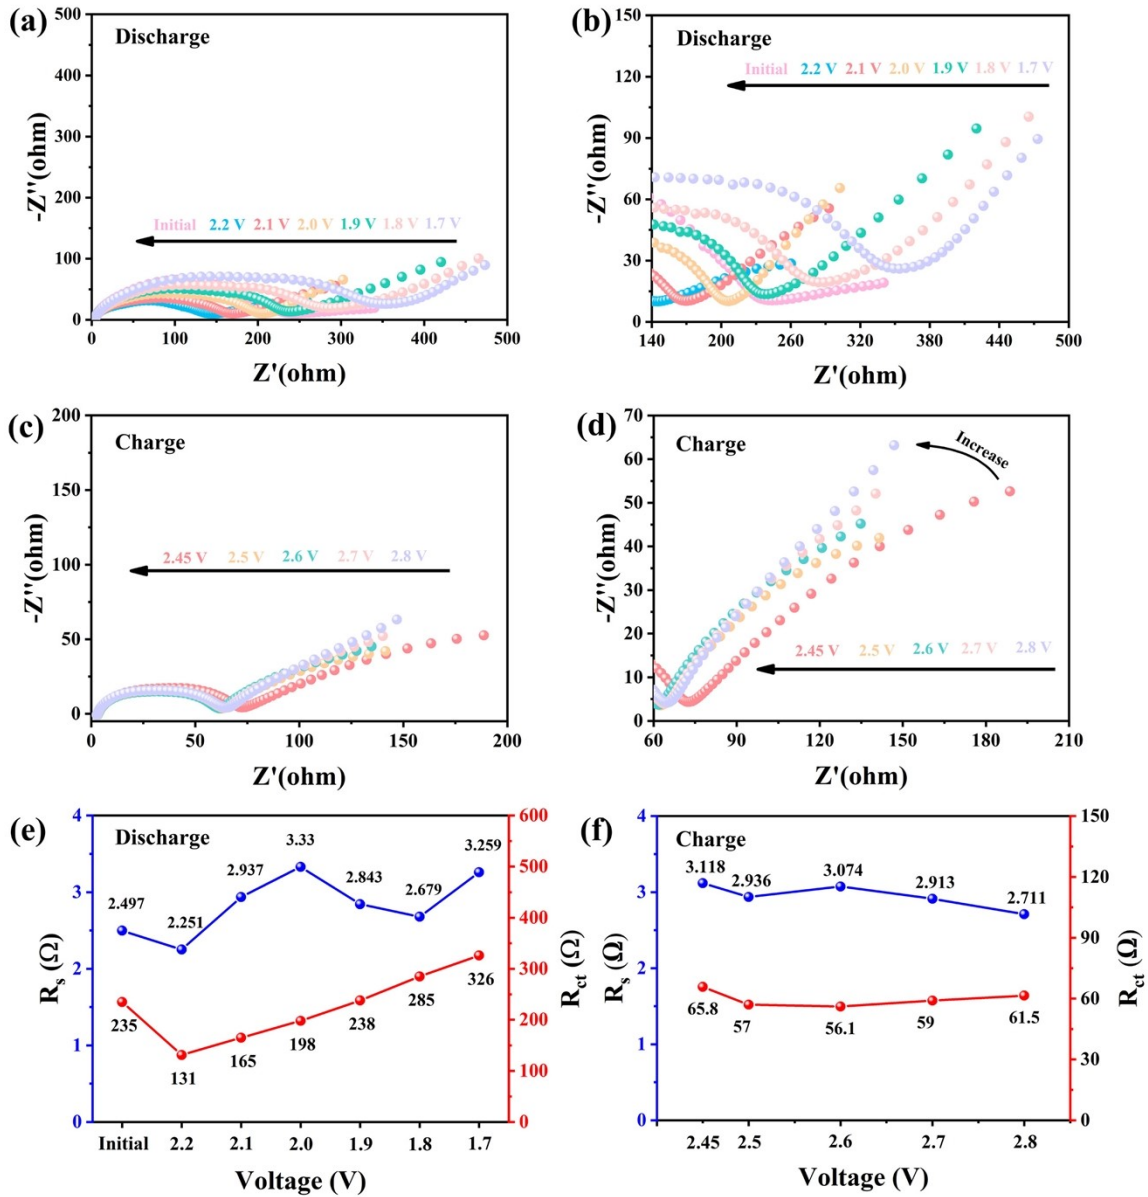

**Figure S12.** (a)-(d) Change of slope during the discharging and charging processes. (e)-(f) The changes of  $R_s$  and  $R_{ct}$  in the equivalent circuit diagram during discharging and charging processes.



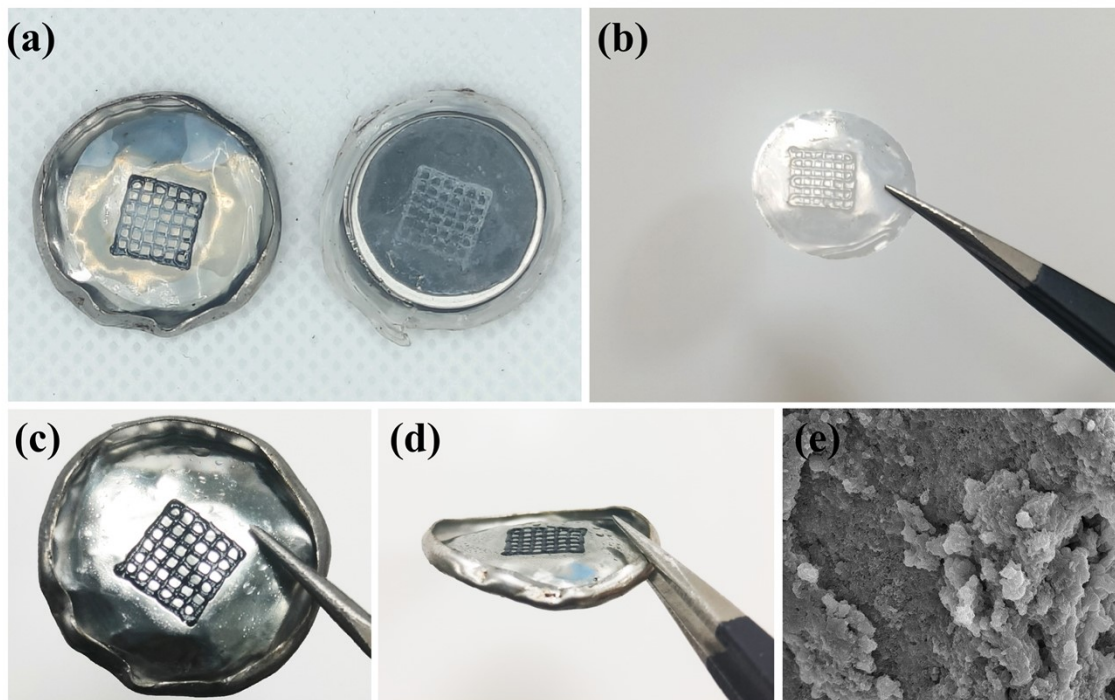

**Figure S13.** (a)-(d) Optical images of the 3DP Al-MOF-160/S cathode after cycling. (e) SEM image of the 3DP Al-MOF-160/S cathode after cycling.
